# Supplementary material for: Plasmonic nanoparticle simulations and inverse design using machine learning
Source: Royal Society of Chemistry journal article supplement (doi:10.1039/c9nr03450a), 2019-01-01
Supplement: c9nr03450a1.pdf [file c9nr03450a1.pdf]

# Plasmonic Nanoparticle Simulation and Inverse Design Using Machine Learning

*Jing He,<sup>†,Δ</sup> Chang He,<sup>†,Δ</sup> Chao Zheng,<sup>†</sup> Qian Wang,<sup>#</sup> and Jian Ye<sup>\*,†,‡,#</sup>*

<sup>†</sup>State Key Laboratory of Oncogenes and Related Genes, School of Biomedical Engineering, Shanghai Jiao Tong University, Shanghai, P. R. China

<sup>‡</sup>Shanghai Key Laboratory of Gynecologic Oncology, Ren Ji Hospital, School of Medicine, Shanghai Jiao Tong University, Shanghai, P. R. China

<sup>#</sup>Shanghai Med-X Engineering Research Center, School of Biomedical Engineering, Shanghai Jiao Tong University, Shanghai, P. R. China

**RECEIVED DATE (to be automatically inserted after your manuscript is accepted if required according to the journal that you are submitting your paper to)**

\*To whom correspondence should be addressed. E-mail: [yejian78@sjtu.edu.cn](mailto:yejian78@sjtu.edu.cn);

<sup>Δ</sup>These authors contributed equally to this work.

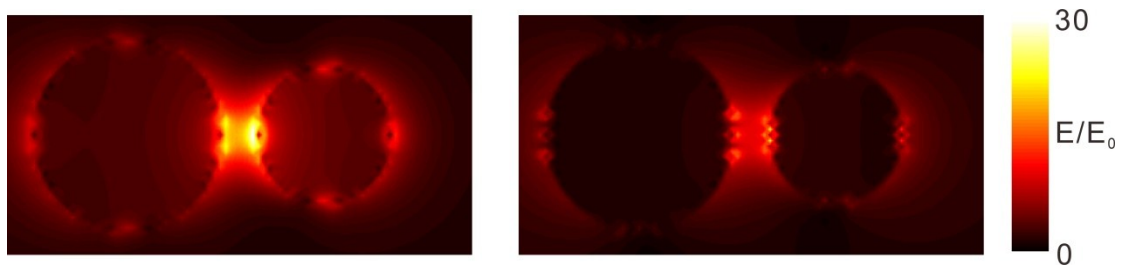

**Figure S1.** Comparison of the electric-field enhancement distributions of dimer (34/24/7) at the (left) dipolar (542 nm) and (right) coupling (618 nm) modes.

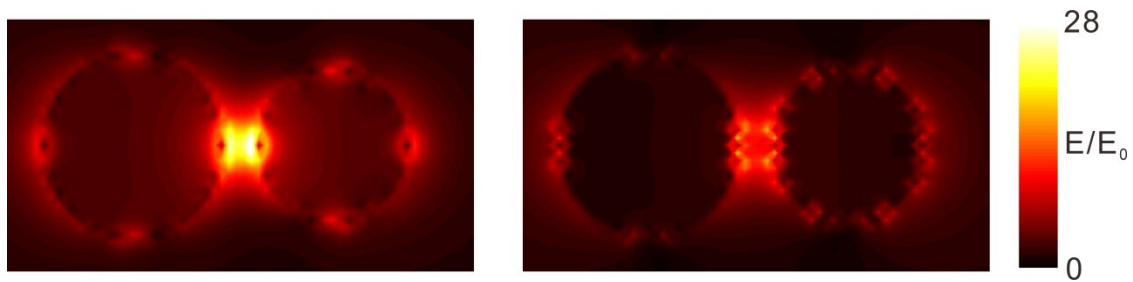

**Figure S2.** Comparison of the electric-field enhancement distributions of dimer (24/20/5) at the (left) dipolar (542 nm) and (right) coupling (613 nm) modes.

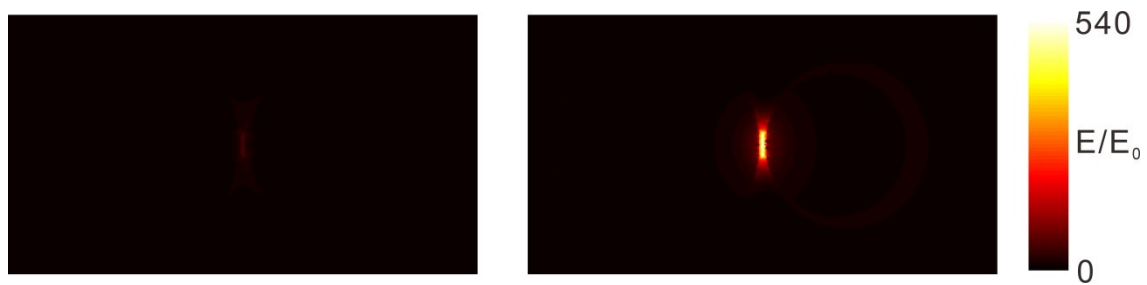

**Figure S3.** Comparison of the electric-field enhancement distributions of dimer (38/26/1) at the (left) dipolar (532 nm) and (right) coupling (637 nm) modes.

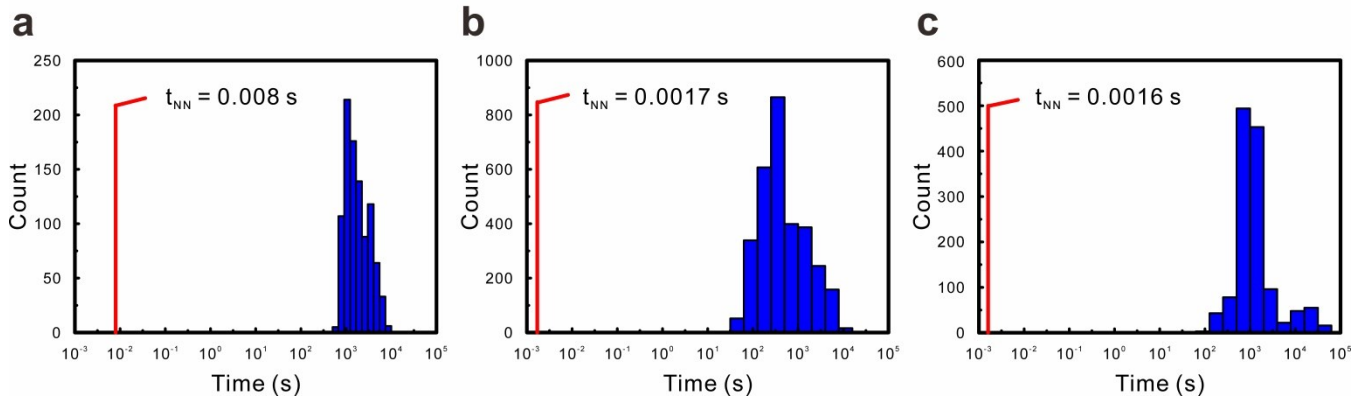

**Figure S4.** Comparisons of the time consumed by numerical simulation and machine learning of Au (a) NSs, (b) NRs, and (c) NS dimers. The blue histograms show the time costed by performing the FDTD simulations on a server (16 cores and 64 GB RAM) and the red lines label the time costed by performing the machine learning process (2 cores and 8 GB RAM).
